## **The Northeast Regional Epilepsy Group,**

a rapidly expanding clinical program with offices and hospital affiliations in New Jersey and New York, is seeking a neuropsychiatrist who trained and is interested in epilepsy.

We are a multidisciplinary team of epileptologists, neuropsychologists, nurse practitioners, and educational and vocational specialists. Duties would involve: psychiatric evaluations (presurgical and baseline), psychopharmacological management, and administration of clinical staff who provide psychotherapy. Must have NY and NJ licenses. Spanish speaking is a plus although not exclusionary. Research interests are strongly encouraged. Competitive salary and benefits.

Please send CV and two letters of reference to:

**Marcelo Lancman, M.D., Medical Director  
Northeast Regional Epilepsy Group  
333 Westchester Avenue, Suite E104  
White Plains, NY 10604  
or email [marclanc@aol.com](mailto:marclanc@aol.com).  
For more information go to:  
[www.epilepsygroup.com](http://www.epilepsygroup.com)**

**VICE CHAIR FOR ACADEMIC CLINICAL SERVICES**  
**DEPARTMENT OF PSYCHIATRY**  
**BRIGHAM AND WOMEN'S/FAULKNER HOSPITALS**

Brigham and Women's/Faulkner Hospital, a teaching affiliate of Harvard Medical School and a founding member of the Partners Healthcare System, is seeking a master clinician-educator-investigator who will play a key role in the oversight, further strategic development, and alignment of superlative clinical services across sites, programs and divisions, with a focus on integration with research and educational activities.

Send letter and CV to:  
**David Silbersweig, M.D.**  
**Chair of Psychiatry and the Institute  
for the Neurosciences**

**Department of Psychiatry**  
**Brigham and Women's Hospital**  
**75 Francis Street, Boston, MA 02115**

**E-mail: [dsilbersweig@partners.org](mailto:dsilbersweig@partners.org)**

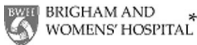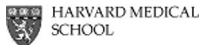

Brigham and Women's/Faulkner Hospitals are equal opportunity/affirmative action employers with strong institutional commitments to diversity in their faculty. Women and minority candidate are particularly encouraged to apply.

# The American Psychiatric Publishing Textbook of Psychiatry, Fifth Edition

Edited by Robert E. Hales, M.D., M.B.A.,  
Stuart C. Yudofsky, M.D., and  
Glen O. Gabbard, M.D.

With Foreword by Alan F. Schatzberg, M.D.

An indispensable resource for clinical psychiatrists studying for Part I of the American Board of Psychiatry and Neurology exam, *The American Psychiatric Publishing Textbook of Psychiatry* is a proven teaching tool and an essential component of every practitioner's library.

2008 • 1,904 pages • ISBN 978-1-58562-257-3  
Hardcover • \$285.00 • Item #62257

Order Online: [www.appi.org](http://www.appi.org)

Toll Free: 1-800-368-5777 • Fax: 703-907-1091

Email: [appi@psych.org](mailto:appi@psych.org)

Priority Code AH830

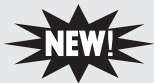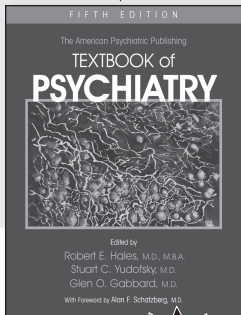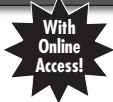

American  
**Psychiatric**  
Publishing, Inc.

The *First* and *Last* Word in Psychiatry

1000 Wilson Boulevard, Suite 1825, Arlington, VA 22209-3901

**NEW!**

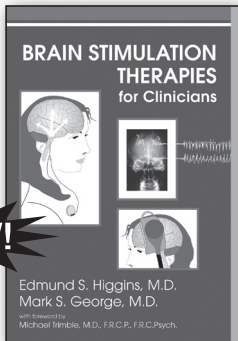

## **Brain Stimulation Therapies for Clinicians**

Edmund S. Higgins, M.D., and Mark S. George, M.D.

With foreword by  
Michael Trimble, M.D., F.R.C.P., F.R.C.Psych.

**2009 • 203 pages • ISBN 978-1-58562-280-1 • Hardcover  
\$70.00 • Item #62280**

American  
**Psychiatric**  
Publishing, Inc.

The *First* and *Last* Word in Psychiatry

**Order Online: [www.appi.org](http://www.appi.org)**

**Toll Free: 1-800-368-5777 • Fax: 703-907-1091**

**Email: [appi@psych.org](mailto:appi@psych.org)**

Priority Code AH921

---

# AMERICAN NEUROPSYCHIATRIC ASSOCIATION

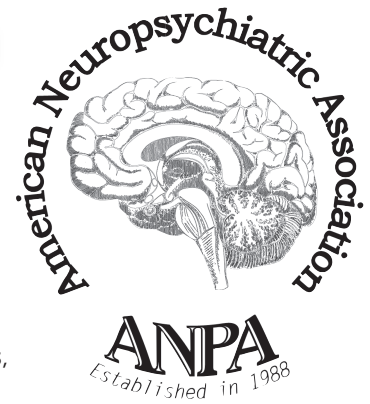

**T**he American Neuropsychiatric Association (ANPA), established in 1988, is an organization of professionals in neuropsychiatry, behavioral neurology and the clinical neurosciences. Our mission is to improve the lives of people with disorders at the interface of psychiatry and neurology through clinical care, education, advocacy and research.

The strength of the organization is our diversity of membership, which is comprised of professionals in neuropsychiatry, behavioral neurology, neuropsychology, neuroradiology, neuropathology, and neurosurgery as well as the basic neurosciences, who share clinical and/or academic interests in neuropsychiatry. The interdisciplinary nature of the membership encourages collaborations among educators, clinicians, researchers, students and trainees in research presentations, symposia, workshops and/or continuing education courses. *The Journal of Neuropsychiatry and Clinical Neurosciences (JNCN)* is the official publication of the organization, and is a benefit of membership.

ANPA holds an annual scientific meeting and provides up to 30 CME/CE credits. Members are encouraged to submit their work for presentation at these annual meetings. Travel awards are available for promising young investigators. Annual meeting abstracts and proceedings are published in *JNCN*.

ANPA has been actively engaged in efforts toward creation of subspecialty certification for neuropsychiatry including developing a core curriculum and guidelines for training in neuropsychiatry. On June 30, 2004 Behavioral Neurology & Neuropsychiatry was approved as a single subspecialty through the Unified Council for Neurologic Subspecialties (UCNS).

---

## BENEFITS OF MEMBERSHIP



- Subscription to *The Journal of Neuropsychiatry and Clinical Neurosciences (JNCN)*
- Discount on subscriptions to PsychiatryOnline.com including DSM Premium and DSM Premium Plus
- Opportunities for presentation at the annual meeting with accepted abstracts published in the *JNCN*
- Significantly reduced registration fees at the annual meeting
- Newsletters, news updates, information on job and training opportunities, research and meeting information on the ANPA web site: [www.anpaonline.org](http://www.anpaonline.org)
- Discounted membership and meeting registration fees for trainees
- Collaboration in clinical, educational and research activities and the opportunity to interact with senior colleagues

---

## MORE INFORMATION

**Website:** [www.anpaonline.org](http://www.anpaonline.org)

**Email:** [anpa@osu.edu](mailto:anpa@osu.edu)

**Phone:** 614-447-2077

---

## JOIN ANPA NOW!

**Join online at:**

<http://www.anpaonline.org/10117.cfm>

---

**DON'T MISS ANPA'S 20TH ANNUAL MEETING**  
**THE WESTIN RIVERWALK • FEBRUARY 19-22, 2009**



**SAN ANTONIO, 2009**

# AMERICAN NEUROPSYCHIATRIC ASSOCIATION

## 20<sup>TH</sup> ANNUAL MEETING

### FEBRUARY 19-22, 2009

SAN ANTONIO

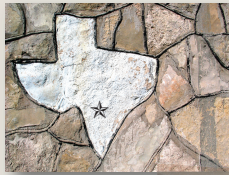

# TEXAS

### The Westin Riverwalk

Located on San Antonio's Paseo del Rio, a pedestrian river walk of hidden gardens, shops and sidewalk cafés one story below downtown! Shaded by cypress and palm trees, The Westin Riverwalk graces this famous thoroughfare and celebrates the beauty and heritage of Texas's oldest city.

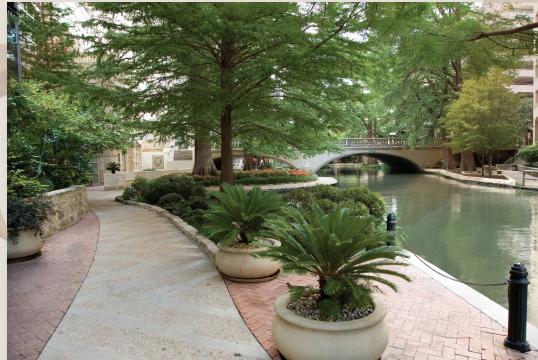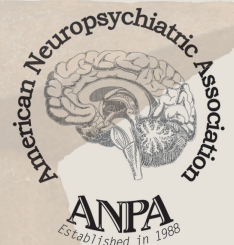

**JOINTLY SPONSORED BY:**  
THE OHIO STATE UNIVERSITY MEDICAL  
CENTER AND THE AMERICAN  
NEUROPSYCHIATRIC ASSOCIATION

**WITH SPECIAL PARTICIPATION OF:**  
THE INTERNATIONAL  
NEUROPSYCHOLOGICAL SOCIETY AND  
THE SOCIETY FOR BEHAVIORAL AND  
COGNITIVE NEUROLOGY

EARN UP TO 28 CME CREDITS FOR PHYSICIANS.

#### PRE-MEETING WORKSHOPS

##### THURSDAY, FEBRUARY 19, 2009

*\*These workshops will be of particular interest to individuals seeking subspecialty certification in Behavioral Neurology & Neuropsychiatry*

##### **THE BRAINSTEM: ANATOMY, ASSESSMENT AND CLINICAL SYNDROMES\***

Robin A. Hurley, M.D., FANPA  
Katherine H. Taber, Ph.D., FANPA  
Laura A. Flashman, Ph.D., FANPA  
Tiffany Chow, M.D., FANPA

##### **GETTING TO KNOW THE RIGHT HEMISPHERE: DOMINANCE IS MORE THAN JUST TALK\***

Daniel I. Kaufer, M.D., FANPA  
A. D. Craig, Ph.D.  
Katherine P. Rankin, Ph.D.

#### MEETING SCHEDULE

##### THURSDAY, FEBRUARY 19, 2009

###### Welcoming Remarks

Fred Ovsiew, M.D., FANPA, President  
Miles G. Cunningham, M.D., Ph.D., Chair,  
Scientific Program Committee

CNPA – Peter Bassoe Keynote Address  
**CONNECTING BRAIN FUNCTION TO MENTAL  
FUNCTION THROUGH COMPUTATION: THE BIRTH  
OF COMPUTATIONAL PSYCHIATRY**  
P. Read Montague, Ph.D.

If you have any questions about the meeting or for general information about ANPA, please contact Sandy Bornstein at the ANPA Office.

American Neuropsychiatric Association  
700 Ackerman Rd, Suite 625  
Columbus, OH 43202

Phone: 614-447-2077  
Fax: 614-263-4366

E-mail: [anpa@osu.edu](mailto:anpa@osu.edu)  
Web Site: [www.anpaonline.org](http://www.anpaonline.org)

##### FRIDAY, FEBRUARY 20, 2009

###### PRESIDENTIAL SYMPOSIUM

###### **NEUROGLIA: FROM GLUE TO GLAMOROUS**

Introduction: Paula T. Trzepacz,  
M.D., FANPA

Chair: Jose Javier Miguel-Hidalgo, Ph.D.

###### **NEW ROLES FOR ASTROCYTES (STARS AT LAST)**

Bruce R. Ransom M.D., Ph.D.

###### **ROLES OF ASTROCYTES IN THE CONTROL OF SLEEP AND MEMORY**

Philip G. Haydon, Ph.D.

###### **NEURONAL REGULATION OF ASTROGLIA AND GLIAL BASED THERAPEUTICS**

Jeffrey D. Rothstein, M.D., Ph.D.

###### **GLIAL NEUROPATHOLOGY IN MAJOR PSYCHIATRIC DISORDERS**

Jose Javier Miguel-Hidalgo, Ph.D.

###### Luncheon and Guest Speaker

###### **THE MEASURE OF TRUTH IN THE COURTROOM: PERSONAL REFLECTIONS**

F. Lee Bailey\*

*\*Supported in part by the MGH/McLean  
Center for Law, Brain and Behavior*

###### **NEUROLOGY, PSYCHIATRY AND CAUSATION IN THE COURTROOM: LOST IN TRANSLATION?**

Chair: Bruce H. Price, M.D.

###### **FAITHFUL TRANSLATION: NEUROLOGY AND PSYCHIATRY IN THE LEGAL ARENA**

Judith G. Edersheim, J.D., M.D.

###### **NEUROLOGY, PSYCHIATRY AND CAUSATION IN THE COURTROOM: LOST IN TRANSLATION?**

Bruce H. Stern, Esq.

###### **UPDATE ON THE NEUROBIOLOGY OF VIOLENCE**

Christopher M. Filley, M.D.

###### **COMMITTEE ON RESEARCH PRESENTATION PSYCHOPHARMACOLOGICAL NEUROPROTECTION IN NEURODEGENERATIVE DISEASE**

Edward C. Lauterbach, M.D., FANPA

###### **HOT TOPICS PRESENTATIONS POSTER SESSION/RECEPTION**

##### SATURDAY, FEBRUARY 21, 2009

###### **NEW APPROACHES TO THE MODULATION OF EMOTIONAL CIRCUITRY**

Chair: Miles G. Cunningham, M.D., Ph.D.

###### **RECONSTRUCTING EMOTIONAL CIRCUITRY THROUGH NEURAL CELL ENGRAFTMENT**

Miles G. Cunningham, M.D., Ph.D.

###### **APPLICATIONS OF GENE TRANSFER FOR THE MODULATION OF FEAR**

Edward G. Meloni, Ph.D.

###### **ADULT HIPPOCAMPAL NEUROGENESIS AND PSYCHIATRIC DISORDERS: NEW HORIZONS FOR NEW NEURONS**

Amelia J. Eisch, Ph.D.

###### **ENDOCRINE REGULATION OF BRAIN AND BEHAVIOR**

Chair: David R. Rubinow, M.D.

###### **GONADAL STEROIDS AND MOOD: THE BRAIN IN CONTEXT**

David R. Rubinow, M.D.

###### **DUELING RECEPTORS: ESTROGEN'S INVOLVEMENT IN ANXIETY AND HORMONAL RESPONSES TO STRESS**

Robert J. Handa, Ph.D.

###### **ESTROGEN REGULATION OF MITOCHONDRIAL FUNCTION AND BIOENERGETICS: CROSS ROADS OF HEALTH OR DISEASE**

Roberta Diaz Brinton, Ph.D.

###### Annual Banquet

###### Award Presentations

###### Presidential Presentation

Paula T. Trzepacz, M.D., FANPA

##### SUNDAY, FEBRUARY 22, 2009

###### ORAL PRESENTATIONS

Research Session Chair

Jeremy D. Schmahmann, M.D., FANPA

Clinical Session Chair

Sheldon Benjamin, M.D., FANPA

MEETING DETAILS AND ONLINE REGISTRATION AVAILABLE AT: [WWW.ANPAONLINE.ORG](http://WWW.ANPAONLINE.ORG)
