# THE JOURNAL OF NEUROPSYCHIATRY and Clinical Neurosciences

The Official Journal of the American Neuropsychiatric Association

## In this issue:

- Neuroanatomy of Pathological Laughing and Crying: A Report of the American Neuropsychiatric Association Committee on Research
- Amygdala Volume in Adults with Posttraumatic Stress Disorder: A Meta-Analysis
- More than Tics: The Behavioral Spectrum of Gilles de la Tourette Syndrome
- Hippocampal Volumes in First Episode Psychosis
- Brain-Derived Neurotrophic Factor Val66Met Polymorphism: Association with Psychopathological Symptoms of Schizophrenia?

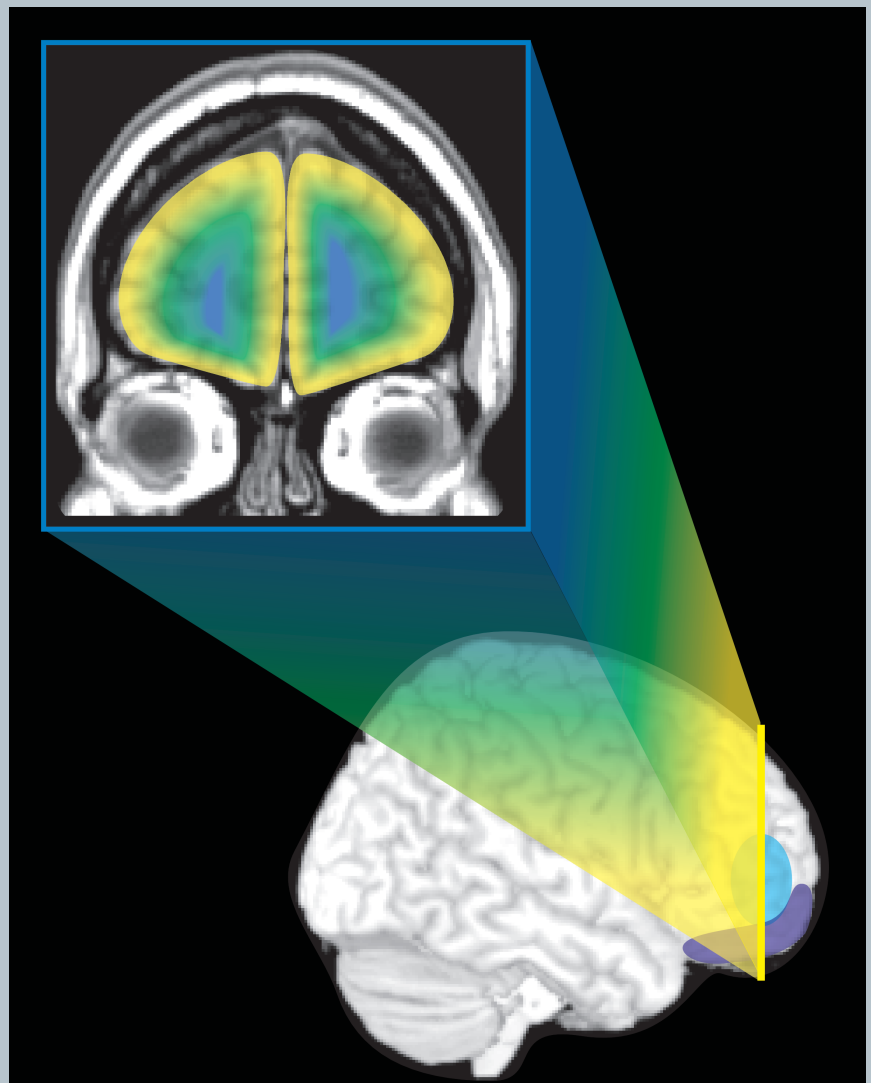

Source: https://psychiatryonline.org/doi/suppl/10.1176/jnp.2009.21.issue-1/suppl_file/cover.pdf
